# Supplementary material for: Constructing of Bacillus subtilis-Based Lux-Biosensors with the Use of Stress-Inducible Promoters
Source: MDPI journal article supplement (doi:10.3390/ijms22179571), 2021-09-03
Supplement: s1 [file s1]

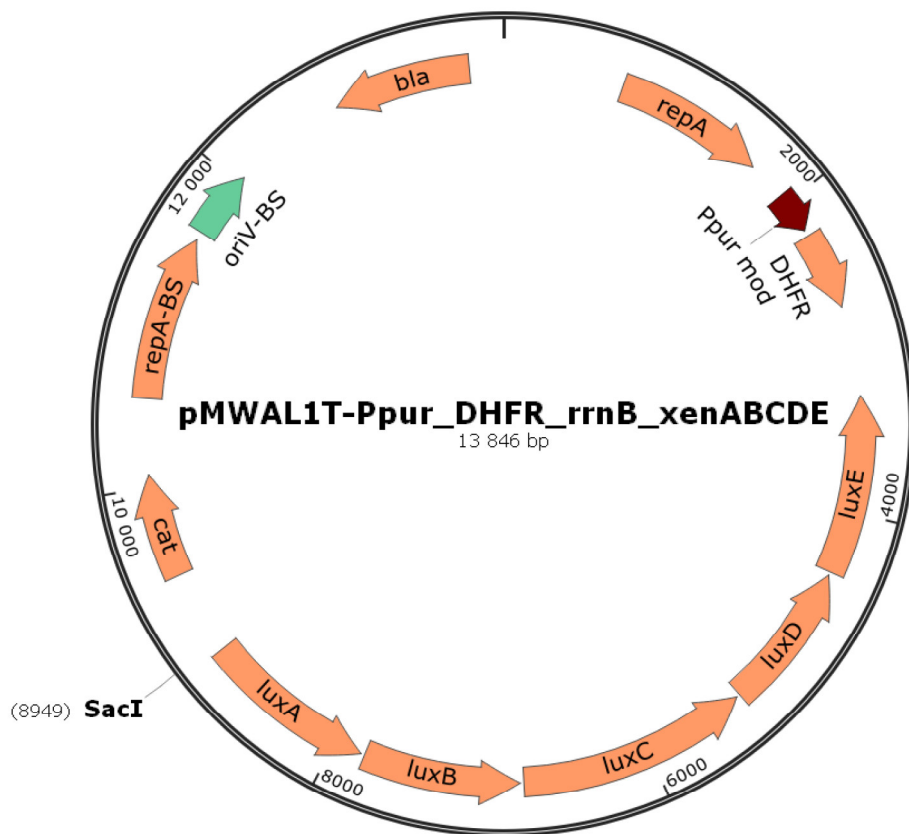

Figure S1: The map of hybrid plasmid pPL\_ABCDE<sub>Exen</sub> [37]. Plasmid pPL\_ABCDE<sub>Exen</sub> is a motorless shuttle vector with two replication origins from pMW118 and pBS72. The reporter genes are *luxABCDE* from *Photobacterium luminescens*. The order of genes in the *lux*-operon and RBS upstream of each gene are optimized for *B. subtilis* expression. Resistance to trimethoprim (Tp<sup>r</sup>), chloramphenicol (Cm<sup>r</sup>), and ampicillin (Ap<sup>r</sup>).

Table S1. List of primers used in the study. Italicized sequences are complementary to pPL\_ABCDE<sub>Exen</sub> around the *SacI* site and were used for Gibson assembly.

|                                         |                                                              |
|-----------------------------------------|--------------------------------------------------------------|
| alkA <sub>dir</sub>                     | <i>TAAAGAAGAGCTTTCAGGAATTCGTTAAATAATTATAAGAAAACCTCAGCTGG</i> |
| alkA <sub>rev</sub>                     | <i>GGCCGCGGTACCGAGCTTGTAATAGCAAGATAACAAAATGAGTAAA</i>        |
| mrgA <sub>Dir</sub> mrgA <sub>Dir</sub> | <i>TAAAGAAGAGCTTTCAGGAATTCGTTCCGATCGCTTTTTCCTTG</i>          |
| mrgA <sub>Rev</sub>                     | <i>GGCCGCGGTACCGAGCTGATCTGTTGACTTAATTATATCATATACT</i>        |
| dinC <sub>Di</sub>                      | <i>GCCGCGGTACCGAGCTTAATTACATTAAAGCAAACATA</i>                |
| dinC <sub>Rev</sub>                     | <i>G TAAAGAAGAGCTTTCAGGAATTCGAAACAGAACAAAGTGTTCTTTTTT</i>    |
| prom <sub>rev</sub>                     | CTGTCCCATGTCATTTCCTCC                                        |
| prom <sub>dir</sub>                     | ATTCATAGAGAGTCCTCCTTGCTT                                     |

The sequences of promoter regions used for constructing new biosensor plasmids by insertion into SacI site of pPL\_ABCDE<sub>ex</sub> are given below:

- *The mrgA gene promoter, which is inducible by oxidative stress*

133 bp fragment of *B. subtilis* 168 gDNA

ttccgacgcttttccttggtctgcgtgggagctctcctgaagaaaagctattcagctgatctaaattataattattataatttagtattgattttatttagtatatg  
atataattaagtcaacagatc

- *The dinC gene promoter, which is inducible by DNA damages*

62 bp fragment of *B. subtilis* 168 gDNA

aaacagaacaagtgttctttttctattgaataccgaacgtatgtttgctttaatgaatta

- *The alkA gene promoter, which is inducible by DNA alkylation*

85 bp fragment of *B. subtilis* 168 gDNA

tgtaatagcaagataacaaaatgagtaaagatgattatgtgataaactaattcaaccagcgtgagtttcttataattatttaa
